# Supplementary material
Source: publisher site journal article supplement (https://www.spandidos-publications.com/1685/downloadSupplementary)
Supplement: Supplementary file 1 [file downloadSupplementary]

## Sheet: Table S8
Table SVIII. List of the differentially expressed mature miRNAs in asymptomatic HTLV-1 infected sujects with monoclonal T cell expansion (ASM) and asymptomatic HTLV-1 infected sujects with polyclonal T cell expansion(ASP) versus healthy controls (HC)
Gene ID	p (Corr)	p	FC ([ASM] vs [HC])	Log FC ([ASM] vs [HC])	FC (abs) ([ASM] vs [HC])	Regulation ([ASM] vs [HC])	FC ([ASP] vs [HC])	Log FC ([ASP] vs [HC])	FC (abs) ([ASP] vs [HC])	Regulation ([ASP] vs [HC])	Accession	Entrez ID	Ensembl ID	Gene Type	DB Refs
MI0000749_1	1.16E-07	2.37E-08	-63242803	-26609013	63242803	down	-53180532	-24108982	53180532	down	hsa-miR-30e-5p	407034		miRNA	miRBase:MI0000749
MI0005767_1	5.90E-07	1.42E-07	-74860225	-29041994	74860225	down	-10538831	-33976429	10538831	down	hsa-miR-942-5p	100126331		miRNA	miRBase:MI0005767
MI0003560_2	0.00179039	9.28E-04	-26577878	-14102259	26577878	down	-2591827	-13739693	2591827	down	hsa-miR-92b-3p	693235	ENSG00000271748	miRNA	miRBase:MI0003560
MI0000086_1	7.14E-13	3.97E-14	14419387	3849938	14419387	up	12926556	3692266	12926556	up	hsa-miR-28-5p	407020		miRNA	miRBase:MI0000086
MI0000086_2	1.72E-09	2.56E-10	2890264	48531294	2890264	up	2030081	43434653	2030081	up	hsa-miR-28-3p	407020		miRNA	miRBase:MI0000086
MI0005532_1	0.005273259	0.002929589	2483436	13123376	2483436	up	26695106	14165753	26695106	up	hsa-miR-874-3p	100126343		miRNA	miRBase:MI0005532
MI0000253_2	0.004496819	0.002414958	26571019	14098536	26571019	up	30852425	16253839	30852425	up	hsa-miR-148a-5p	406940	ENSG00000199085	miRNA	miRBase:MI0000253
MI0000082_1	1.14E-10	1.48E-11	-51010714	-23508003	51010714	down	-51502905	-23646538	51502905	down	hsa-miR-25-3p	407014		miRNA	miRBase:MI0000082
MI0000816_2	9.81E-06	3.27E-06	30833645	49464335	30833645	up	36472084	51887207	36472084	up	hsa-miR-335-3p	442904		miRNA	miRBase:MI0000816
MI0022688_2	3.70E-06	1.10E-06	4718837	22384312	4718837	up	4425129	21457195	4425129	up	hsa-miR-6842-3p			miRNA	miRBase:MI0022688
MI0000090_2	1.72E-06	4.77E-07	-21744574	-44425836	21744574	down	-15528896	-39568834	15528896	down	hsa-miR-32-5p	407036		miRNA	miRBase:MI0000090
MI0003129_1	2.67E-04	1.29E-04	2804904	14879514	2804904	up	40974245	20347173	40974245	up	hsa-miR-146b-5p	574447	ENSG00000202569	miRNA	miRBase:MI0003129
MI0006444_2	9.43E-05	4.02E-05	-7274834	-28629143	7274834	down	-53586044	-24218574	53586044	down	hsa-miR-1307-5p	100302174	ENSG00000221767	miRNA	miRBase:MI0006444
MI0006344_2	1.67E-05	5.87E-06	-463101	-22113268	463101	down	-39229488	-19719385	39229488	down	hsa-miR-548e-3p	100313921		miRNA	miRBase:MI0006344
MI0000808_1	6.13E-06	1.93E-06	8198277	30353208	8198277	up	11527072	35269542	11527072	up	hsa-miR-326	442900		miRNA	miRBase:MI0000808
MI0000434_2	0.01289571	0.007641902	-31667228	-16629906	31667228	down	-23479536	-12314038	23479536	down	hsa-let-7i-3p	406891	ENSG00000199179	miRNA	miRBase:MI0000434
MI0000076_1	2.69E-07	5.99E-08	-5144854	-236313	5144854	down	-38671858	-1951284	38671858	down	hsa-miR-20a-5p	406982	ENSG00000215417	miRNA	miRBase:MI0000076
MI0000472_2	5.90E-05	2.40E-05	1933349	42730303	1933349	up	15593656	39628873	15593656	up	hsa-miR-127-3p	406914	ENSG00000207608	miRNA	miRBase:MI0000472
MI0003675_1	1.17E-04	5.20E-05	18792887	4232115	18792887	up	18864815	4237626	18864815	up	hsa-miR-411-5p	693121	ENSG00000199109	miRNA	miRBase:MI0003675
MI0003676_2	2.65E-05	9.81E-06	32640358	5028585	32640358	up	4192753	5389826	4192753	up	hsa-miR-654-3p	724024	ENSG00000207934	miRNA	miRBase:MI0003676
MI0025242_1	6.90E-07	1.79E-07	-5598615	-248507	5598615	down	-6895095	-27855704	6895095	down	hsa-miR-7706			miRNA	miRBase:MI0025242
MI0000079_1	1.09E-14	2.02E-16	40316544	53333	40316544	up	3693255	5206821	3693255	up	hsa-miR-23a-3p	407010	ENSG00000207980	miRNA	miRBase:MI0000079
MI0000066_1	6.05E-12	6.72E-13	10067761	3331671	10067761	up	11325969	35015626	11325969	up	hsa-let-7e-5p	406887	ENSG00000198972	miRNA	miRBase:MI0000066|RFAM:RF00027
MI0000469_1	2.88E-05	1.12E-05	66604815	27356265	66604815	up	57725954	252922	57725954	up	hsa-miR-125a-5p	406910	ENSG00000208008	miRNA	miRBase:MI0000469
MI0000299_1	2.04E-09	3.78E-10	11287628	34966705	11287628	up	106984415	34193287	106984415	up	hsa-miR-222-3p	407007	ENSG00000207725	miRNA	miRBase:MI0000299
MI0003205_1	9.57E-13	7.09E-14	-8869562	-31488628	8869562	down	-8537428	-30938015	8537428	down	hsa-miR-532-5p	693124		miRNA	miRBase:MI0003205
MI0000762_1	1.48E-04	6.84E-05	-5189739	-2375662	5189739	down	-57615304	-2526452	57615304	down	hsa-miR-362-5p	574030		miRNA	miRBase:MI0000762
MI0000760_2	2.00E-09	3.34E-10	9502422	32482953	9502422	up	77384033	2952036	77384033	up	hsa-miR-361-5p	494323		miRNA	miRBase:MI0000760
MI0000764_1	7.14E-13	3.06E-14	-23374422	-4546859	23374422	down	-2615667	-4709107	2615667	down	hsa-miR-363-3p	574031	ENSG00000207572	miRNA	miRBase:MI0000764
MI0000113_2	1.65E-12	1.53E-13	-76743646	-29400473	76743646	down	-7908217	-29833524	7908217	down	hsa-miR-106a-5p	406899	ENSG00000207602	miRNA	miRBase:MI0000113|RFAM:RF00051
